# Supplementary material for: Detection of Staphylococcus aureus Delta-Toxin Production by Whole-Cell MALDI-TOF Mass Spectrometry
Source: PLOS journal article supplement (doi:10.1371/journal.pone.0040660), 2012-07-06
Supplement: S3 (10.1371/journal.pone.0040660.s003) [file journal.pone.0040660.s003]

**Table S2. Clinical characteristics of patients with chronic infections.**

| Patient number | Clinical diagnosis                                                         | Delta toxin detection<br>by WC-MALDI-TOF MS <sup>a</sup> |
|----------------|----------------------------------------------------------------------------|----------------------------------------------------------|
| 1              | Chronic cutaneous abscess in diabetic hemodialysis patient                 | $\delta^+$ <sup>b</sup>                                  |
| 2              | Chronic bronchial suture infection in a lung-transplanted diabetic patient | $\delta^+$                                               |
| 3              | Chronic lung infection in CF <sup>c</sup> patient                          | $\delta^+$                                               |
| 4              | Chronic lung infection in CF patient                                       | $\delta^+$                                               |
| 5              | Chronic lung infection in CF patient                                       | $\delta^+$                                               |
| 6              | Chronic lung infection in CF patient                                       | $\delta^+$                                               |
| 7              | Chronic lung infection in CF patient                                       | $\delta^+$                                               |
| 8              | Chronic lung infection in CF patient                                       | $\delta^+$                                               |
| 9              | Chronic lung infection in CF patient                                       | $\delta^+$                                               |
| 10             | Chronic lung infection in CF patient                                       | $\delta^+$                                               |
| 11             | Chronic amputation-site infection in a diabetic patient                    | $\delta^+$                                               |
| 12             | Diabetic foot infection                                                    | $\delta^+$                                               |
| 13             | Chronic osteoarthritis of the left hand in a diabetic patient              | $\delta^+$                                               |
| 14             | Diabetic foot infection                                                    | $\delta^+$                                               |
| 15             | Recurrent bacteremia in dialysis and diabetic patient                      | $\delta^-$ <sup>d</sup>                                  |
| 16             | Chronic lung infection in CF patient                                       | $\delta^-$                                               |
| 17             | Chronic lung infection in CF patient                                       | $\delta^-$                                               |
| 18             | Chronic lung infection in CF patient                                       | $\delta^-$                                               |
| 19             | Chronic lung infection in CF patient                                       | $\delta^-$                                               |
| 20             | Diabetic foot infection                                                    | $\delta^-$                                               |

<sup>a</sup>WC-MALDI-TOF MS: Whole-Cell Matrix Assisted Laser Desorption Ionization - Time-of-Flight mass spectrometry ; <sup>b</sup> $\delta^+$ : detection of delta toxin ; <sup>c</sup>CF: cystic fibrosis ; <sup>d</sup> $\delta^-$ : no detection of delta toxin.
